# Supplementary material
Source: bioRxiv or medRxiv preprint supplement (https://www.medrxiv.org/highwire/filestream/88596/field_highwire_adjunct_files/0/2020.07.04.20146548-1.pdf)
Supplement: Supplementary file [file 2020.07.04.20146548-1.pdf]

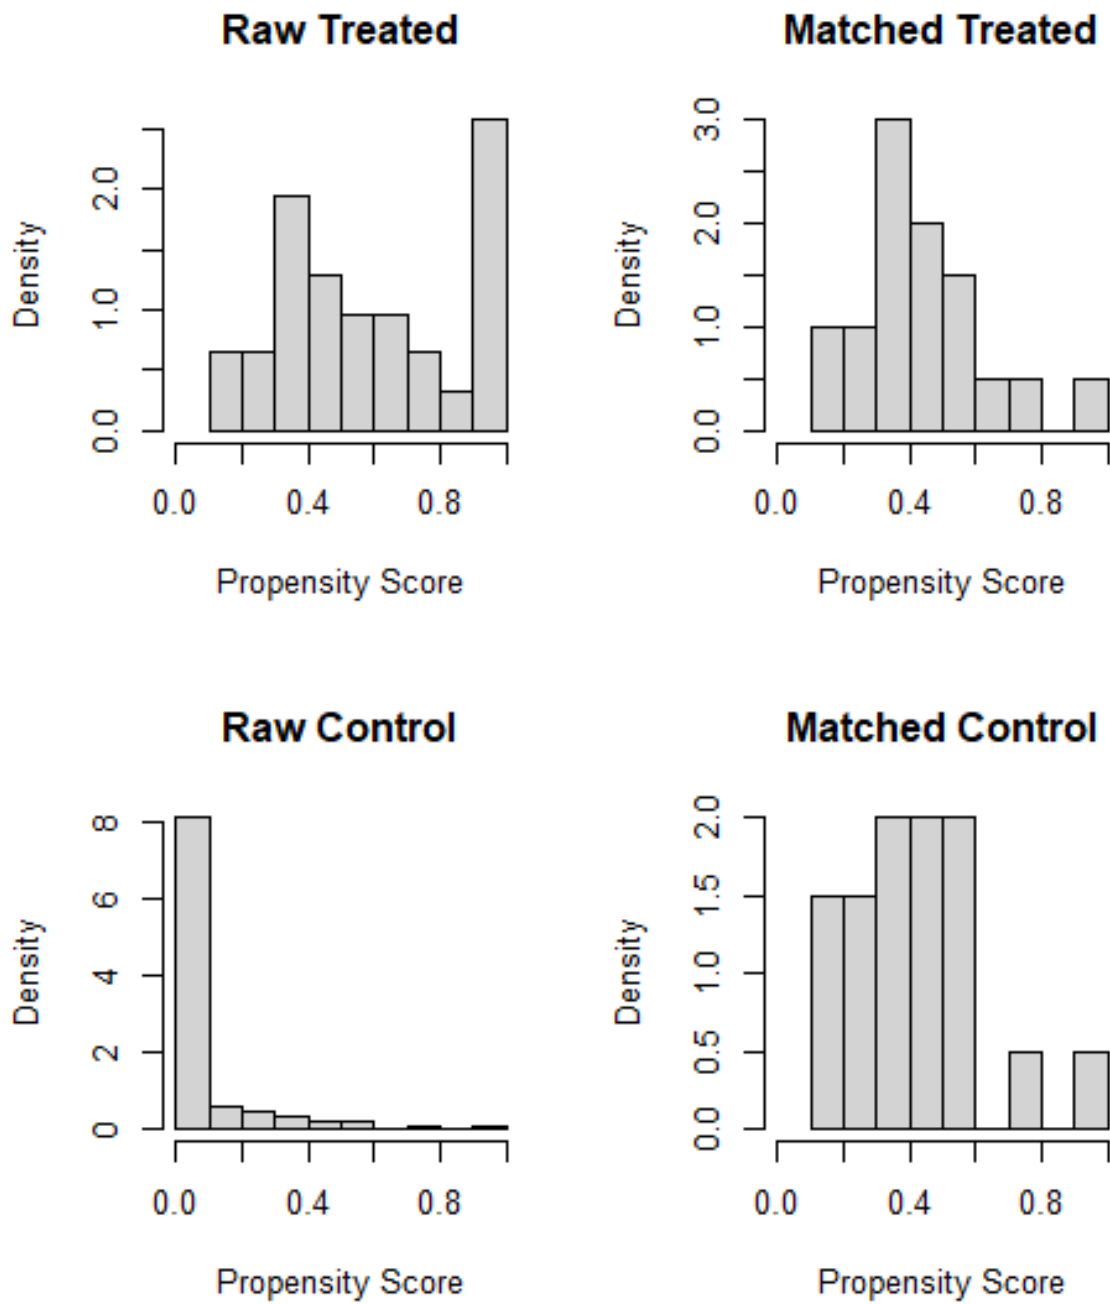

Supplementary Figure 1. The distribution of the estimated propensity scores for administration of HQ and standard supportive therapy
